# Supplementary material for: Lymphocyte-Specific Protein 1 Regulates Expression and Stability of Endothelial Nitric Oxide Synthase
Source: Biomolecules. 2024 Jan 15;14(1):111. doi: 10.3390/biom14010111 (PMC10813790; doi:10.3390/biom14010111)
Supplement: Supplementary file 1 [file biomolecules-14-00111-s001.zip › Supplementary file S1 mass spectrometry material-1.xlsx]

## Sheet: Sheet1
TPSPLVLEGtIEQSSPPLsPTT_LSP1 60 kDa
Fragment ion	Calculated Mass	Measured mass	Fragment ion	Calculated mass	Measured mass	Validation
y1	147.113	147.113	b1	102.055	102.059	Valid PPt
y2	248.161	248.163	b2	199.108	199.107
y3	349.208	349.223	b3	286.14	286.099
y4	446.261	446.263	b4	383.192	383.18
y5	613.259	613.305	b5	496.277	496.273
y6	726.343	726.464	b6	595.345	595.352
y7	823.396	823.424	b7	708.429	708.442
y8	920.449	920.468	b8	837.472	837.441
y9-H2O	989.47	989.462	b9	894.493	894.505
y10-NH3	1077.49	1077.54	b10	1075.51	ND
y11-NH3	1205.55	1205.57	b11	1188.59	1188.56
y12	1351.61	ND	b12	1317.63	1317.69
y13	1464.7	ND	b13	1445.69	ND
y14	1645.71	ND	b14	1532.72	ND
				1619.76	1619.75
TPSPLVLEGTIEQSsPPLsPTTK_LSP1 55 kDa
Fragment ion	Calculated Mass	Measured mass	Fragment ion	Calculated mass	Measured mass	Validation
y1	147.113	147.115	b1	102.055	102.055	Valid PPt
y2	248.161	248.166	b2	199.108	199.111
y3	349.208	349.213	b3	286.14	286.14
y4	446.261	446.268	b4	383.192	383.104
y5	613.259	613.268	b5	496.277	496.281
y6	726.343	726.354	b6	595.345	595.352
y7	823.396	823.405	b7	708.429	708.442
y8	920.449	920.465	b8	837.472	837.49
y9	1087.45	1087.47	b9	894.493	894.51
y10	1174.48	1174.49	b10	995.541	995.555
y11	1302.54	1302.53	b11	1108.62	1108.64
y12	1431.58	1431.58	b12	1237.67	1237.69
y13-H2O	1526.65	1526.92	b13	1365.73	1365.75
y14	1645.71	ND	b14	1452.76	1452.8
			b15	1619.76	1619.77
sPEGEQEDRPGLHAYEK_LSP1 60 kDa
Fragment ion	Calculated Mass	Measured mass	Fragment ion	Calculated mass	Measured mass	Validation
y1	147.113	147.115	b1	168.006	ND	Valid PPt
y2	276.155	276.166	b2	265.058	265.062
y3	439.219	ND	b3	394.101	394.104
y4	510.256	510.262	b4	451.123	451.125
y5	647.315	647.316	b5	580.165	580.615
y6	760.399	ND	b6	708.224	ND
y7	817.42	ND	b7	837.266	ND
y8	914.473	914.489	b8	952.293	ND
y9	1070.57	1070.58	b9	1108.39	ND
y10+2	593.304	593.307	b10	1205.45	ND
y11	1314.64	ND	b11	1262.47	ND
y12	1442.7	1442.72	b12	1375.55	ND
y13-H2O	1571.74	ND	b13	1512.61	ND
y14	1628.77	ND	b14	1583.65	ND
y15-H2O+3	580.604	580.615	b15
y15+3	586.608	586.954
y16+3	618.959	618.966
y134+2	814.887	814.901
SPEGEQEDRPGLHAYEK_LSP1 55 kDa
Fragment ion	Calculated Mass	Measured mass	Fragment ion	Calculated mass	Measured mass	Validation
y1	147.113	ND	b1-H2O	70.0287	70.0663	Valid PPt
y2	276.155	276.166	b2	185.092	185.088
y3	439.219	439.215	b3	314.135	314.136
y4	510.256	510.254	b4	371.156	371.227
y5	647.315	647.376	b5	500.199	ND
y6	760.399	ND	b6	628.257	ND
y7	817.42	ND	b7	757.3	ND
y8	914.473	914.486	b8	872.327	872.359
y9	1070.57	ND	b9-NH3	1011.4	1011.51
y10	1185.6	ND	b10	1125.48	ND
y11	1314.64	ND	b11	1182.5	ND
y12	1442.7	ND	b12	1295.59	ND
y13	1571.74	ND	b13	1432.65	ND
y14+2	814.887	814.904	b14	1503.68	ND
y15+2	879.408	879.412	16+2	898.398	898.392
y16+2	927.934	927.928
TPSPLVLEGTIEQsSPPLSPTtK_LSP1 60 kDa
Fragment ion	Calculated Mass	Measured mass	Fragment ion	Calculated mass	Measured mass	Validation
y1	147.113	147.113	b1	102.055	102.058	Valid PPt
y2	328.127	ND	b2	199.108	199.105
y3	429.175	ND	b3	286.14	286.181
y4	526.227	ND	b4	383.192	383.294
y5	613.259	ND	b5	496.277	496.28
y6	726.343	ND	b6	595.345	595.358
y7	823.396	823.409	b7	708.429	ND
y8	920.449	920.46	b8	837.472	837.468
y9	1007.48	ND	b9	894.493	ND
y10	1174.48	ND	b10	995.541	995.556
y11	1302.54	ND	b11	1108.62	ND
y12	1431.58	1431.6	b12	1237.67	1237.65
y13	1544.66	ND	b13	1365.73	1365.76
			b14	1532.72	ND
			16+2
TPSPLVLEGTIEQsSPPLSPtTK_LSP1 60 kDa
Fragment ion	Calculated Mass	Measured mass	Fragment ion	Calculated mass	Measured mass
y1	147.113	147.114	b1	102.055	102.055
y2	248.161	248.164	b2	199.108	199.113
y3	429.175	ND	b3	286.14	286.135
y4	526.227	ND	b4	383.192	383.2
y5	613.259	613.268	b5	496.277	496.283
y6	726.343	726.343	b6	595.345	595.352
y7	823.396	823.411	b7	708.429	708.436
y8	920.449	920.456	b8	837.472	837.485
y9	1007.48	1007.47	b9	894.493	894.507
y10	1174.48	1174.5	b10	995.541	995.56
y11	1302.54	ND	b11	1108.62	1108.64
y12	1431.58	1431.57	b12	1237.67	1237.69
y13	1544.66	ND	b13-H2O	1348.7	1348.75
	1645.71	ND	b14	1532.72	ND
			16+2	1619.76	ND
