# Supplementary material for: Lymphocyte-Specific Protein 1 Regulates Expression and Stability of Endothelial Nitric Oxide Synthase
Source: Biomolecules. 2024 Jan 15;14(1):111. doi: 10.3390/biom14010111 (PMC10813790; doi:10.3390/biom14010111)
Supplement: Supplementary file 1 [file biomolecules-14-00111-s001.zip › Supplementary file S2 mass spectrometry material-2.xlsx]

## Sheet: Sheet1
DLCDPHR
Fragment ion	Calculated Mass (m/z)	Measured Mass (m/z)	Fragment ion	Calculated Mass (m/z)	Measured Mass (m/z)	Validation
y1	175.119	175.121	b1	116.034	ND	Valid PPt
y2	312.178	312.183	b2	229.118	229.119
y3	409.231	409.236	b3	389.149	389.151
y4	524.258	524.264	b4	504.176	ND
y5	684.288	684.297	b5	601.229	ND
y6	797.372	ND	b6	738.288	738.293
